# Supplementary material
Source: PubMed Central journal article supplement (PMC5289391)
Supplement: NIHMS807962-supplement.pdf [file NIHMS807962-supplement.pdf]

## Supporting Information

### Role of Nanoparticle Size, Shape and Surface Chemistry in Oral Drug Delivery

Amrita Banerjee<sup>1\*</sup>, Jianping Qi<sup>1,2\*</sup>, Rohan Gogoi<sup>3</sup>, Jessica Wang<sup>1</sup> and Samir Mitragotri<sup>1,4#</sup>

<sup>1</sup>Department of Chemical Engineering, University of California, Santa Barbara, Santa Barbara, CA 93106, USA, <sup>2</sup>School of Pharmacy, Fudan University, Shanghai 201203, PR China, <sup>3</sup>College of Letters and Science, University of California, Santa Barbara, Santa Barbara, CA 93106, USA, <sup>4</sup>Center for Bioengineering, University of California, Santa Barbara, Santa Barbara, CA 93106, USA

*#Correspondence to:* S. Mitragotri, Department of Chemical Engineering, Engineering II, Room 3349, University of California, Santa Barbara, CA 93106-5080, USA

Email: [samir@engineering.ucsb.edu](mailto:samir@engineering.ucsb.edu)

\* These authors have contributed equally

## Table of Contents

### Page

- 3 Confocal micrographs of transwell membranes containing triple co-culture cells incubated with different size spherical nanoparticles
- 4 Confocal micrographs of transwell membrane containing triple co-culture cells incubated with different shaped nanoparticles
- 5 Confocal micrographs of transwell membranes containing triple co-culture cells incubated with biotin-conjugated nanoparticles of different shapes

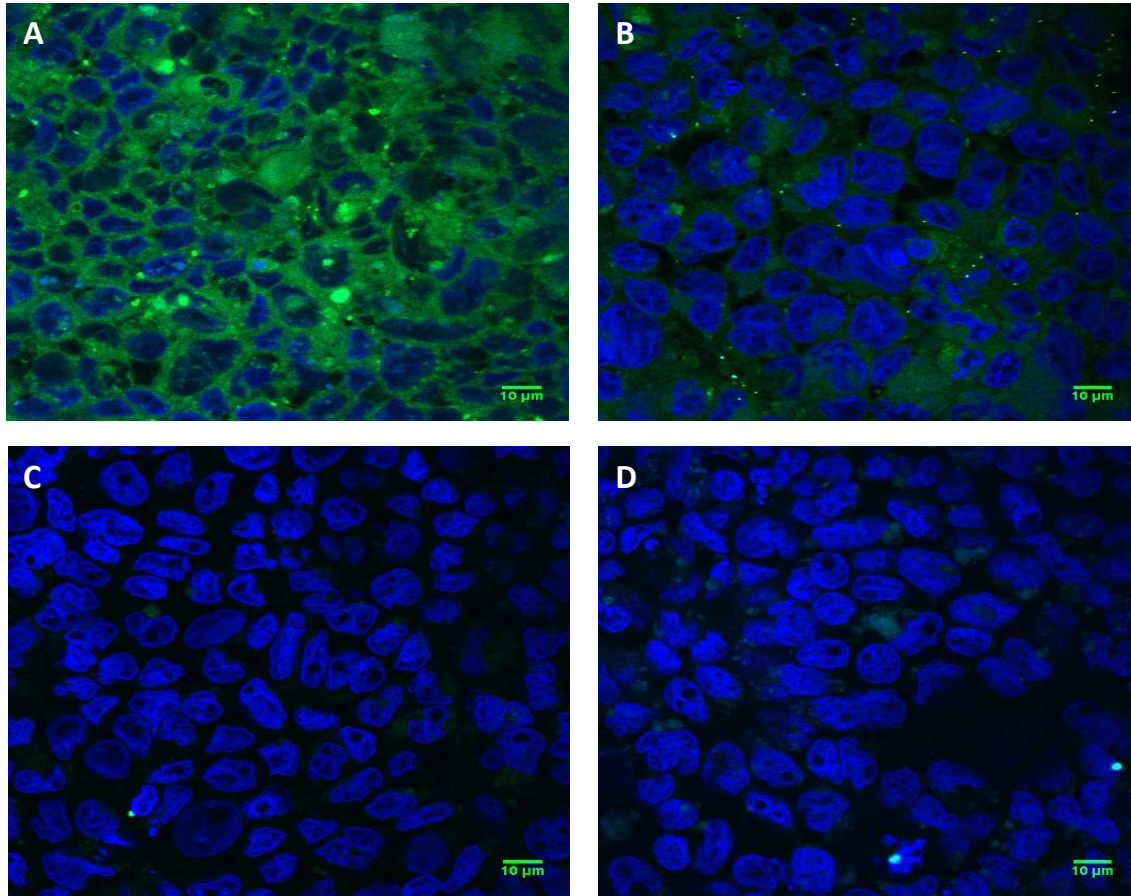

**Figure S1: Confocal micrographs of transwell membrane containing triple co-culture cells incubated with different size nanoparticles.**

Representative confocal microscopy images of transwell membrane seeded with Caco-2/HT-29/Raji-B cells at the end of transport studies conducted using A) 50 nm spheres; B) 200 nm spheres; C) 500 nm spheres and D) 1000 nm spheres. Green fluorescence represents particles while blue color represents cell nuclei (DAPI staining).

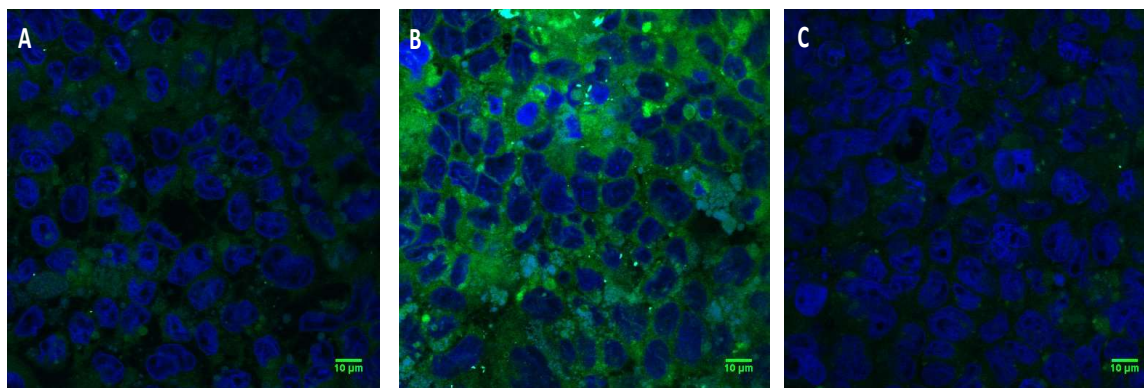

**Figure S2: Confocal micrographs of transwell membranes containing triple co-culture cells incubated with different shaped nanoparticles.**

Representative confocal microscopy images of transwell membrane seeded with Caco-2/HT-29/Raji-B cells at the end of transport studies conducted using A) Spheres; B) Rods and C) Discs. Green fluorescence represents particles while blue color represents cell nuclei (DAPI staining).

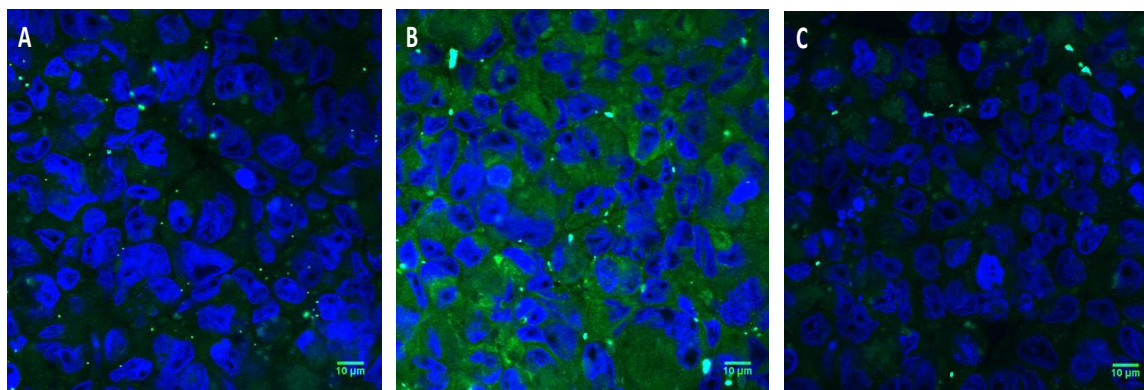

**Figure S3: Confocal micrographs of transwell membranes containing triple co-culture cells incubated with biotin-conjugated nanoparticles of different shapes.**

Representative confocal microscopy images of transwell membrane seeded with Caco-2/HT-29/Raji-B cells at the end of transport studies conducted using A) Biotin-conjugated spheres B) Biotin-conjugated rods C) Biotin-conjugated discs. Green fluorescence represents particles while blue color represents cell nuclei (DAPI staining).
